# Supplementary material for: Establishing Sanctioned Safe Consumption Sites in the United States: Five Jurisdictions Moving the Policy Agenda Forward
Source: Atypon-hosted journal article supplement (doi:10.1176/appi.ps.201800398), 2019-02-13
Supplement: appi.ps.201800398.ds001.pdf [file appi.ps.201800398.ds001.pdf]

 


Psychiatry Online
